# Supplementary material
Source: Springer Nature journal article supplement (https://www.springerprofessional.de/resource/supplementary/13174_2013_4_MOESM2_ESM.pdf/10784748)
Supplement: MOESM2 [file 10784748]

**Input:** A super-peer  $n_i$  and  $n_i$  is under-loaded

**Operation:**

**if**  $UpdSP = \text{RetriveUpdateSPc}(n_i)$  **then**

$\text{UpdateSPCandidates}(n_i, UpdSP)$ .

**end if**

**if**  $\text{ExistBiggerSPCandidate}(n_i) == \text{true}$  **then**

$\text{CanSP}(n_i) = \text{RetriveNewSPCandidates}(n_i)$ .

$\text{NotifyNewSPcandidates}(n_i)$ .

**if**  $n_i \notin \text{CanSP}(n_i)$  **then**

$\text{TransferClients}(n_i)$ .

$\text{ChangeRole}(n_i)$ .

**end if**

**else**

$\text{AddClientnodes}(n_i)$ .

**end if**
